# Supplementary material for: Growth of single-crystalline rutile TiO2 nanorod arrays on GaN light-emitting diodes with enhanced light extraction
Source: Royal Society of Chemistry journal article supplement (doi:10.1039/c2jm14369k), 2012-01-01
Supplement: c2jm14369k.pdf [file c2jm14369k.pdf]

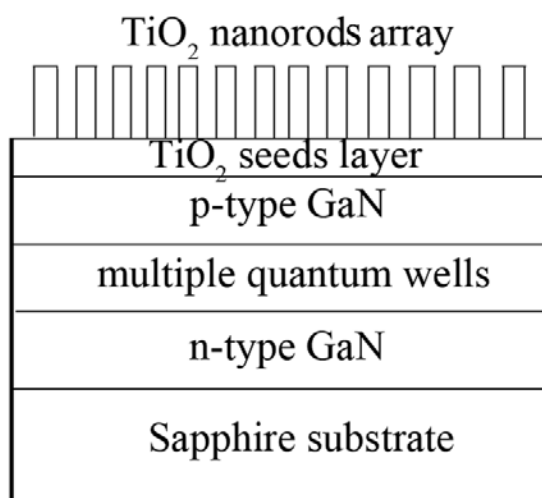

Figure S1 Schematic diagram of GaN-based LED wafer with TiO<sub>2</sub> nanorods array

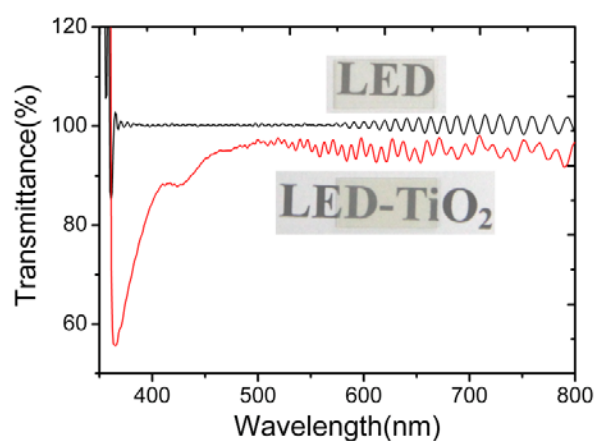

Figure S2 Transmission spectrums of bare GaN wafer (black) and GaN wafer with single-crystalline rutile TiO<sub>2</sub> nanorods array (red)

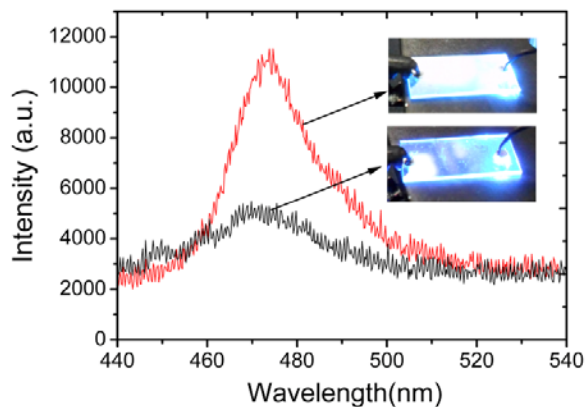

Figure S3 Comparison of EL intensity between bare GaN LEDs (black) and GaN LEDs covered with single-crystalline rutile TiO<sub>2</sub> nanorod array (red). Inset is the corresponding images of the illuminated LED wafers at 2 mA.

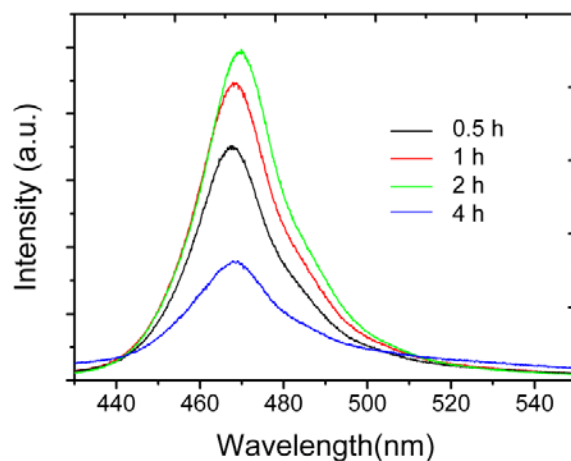

Figure S4-1 Comparison of room temperature PL intensity of LED wafers with TiO<sub>2</sub> nanorods array obtained by different hydrothermal time. (0.5h, 1h, 2h and 4h at 160 °C)

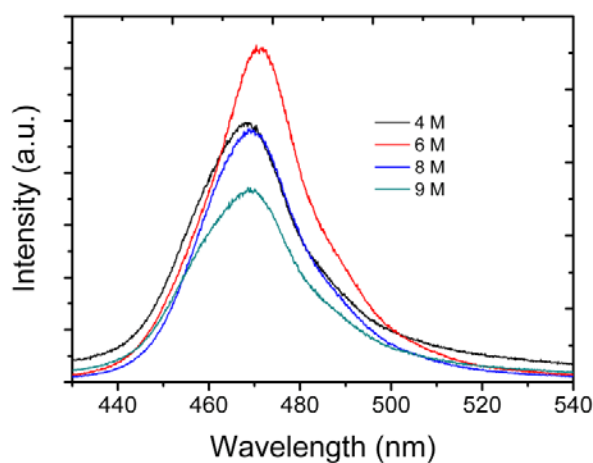

Figure S4-2 Comparison of room temperature PL intensity of LED wafers with TiO<sub>2</sub> nanorods array obtained by different hydrochloric acid concentration. (4, 6, 8 and 9M at 160 °C for 2h)
